# Supplementary material
Source: PubMed Central journal article supplement (PMC3831652)
Supplement: NIHMS479050-supplement-Supp_Fig_S1-S3___Supp_Table_S1.pdf [file NIHMS479050-supplement-Supp_Fig_S1-S3___Supp_Table_S1.pdf]

**Figure S1. Example mass results for w/t hBD-3 and some mutants.** Mass spectra of w/t hBD-3 and mutant 6-45 (delete first 5 residues), 6-39 (delete first 5 and last 6 residues), 6-36 (delete first 5 and last 9 residues), and R36I (replace R36 with I36).

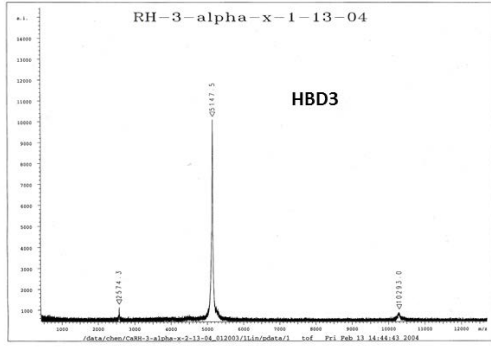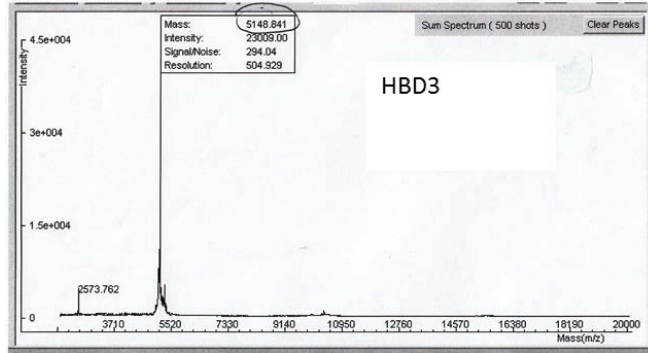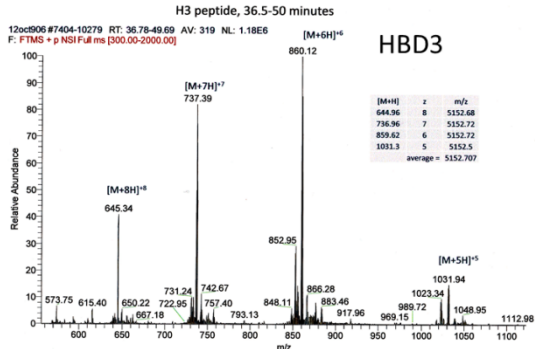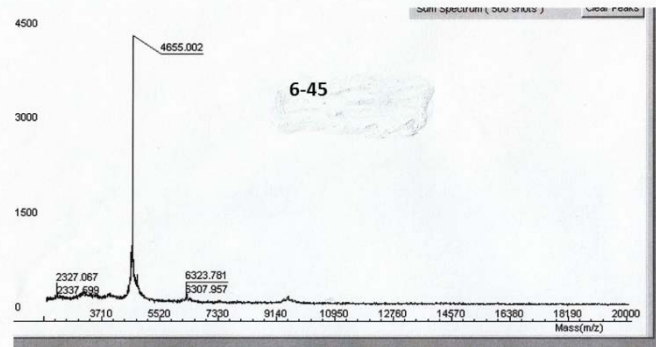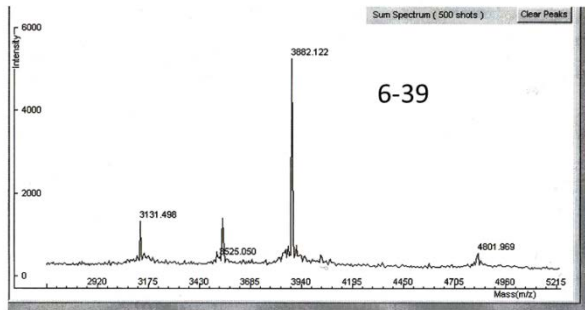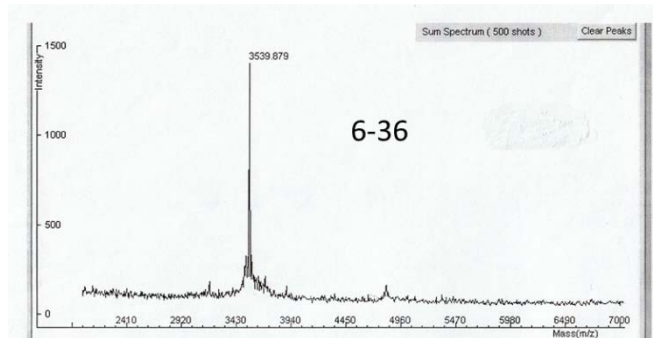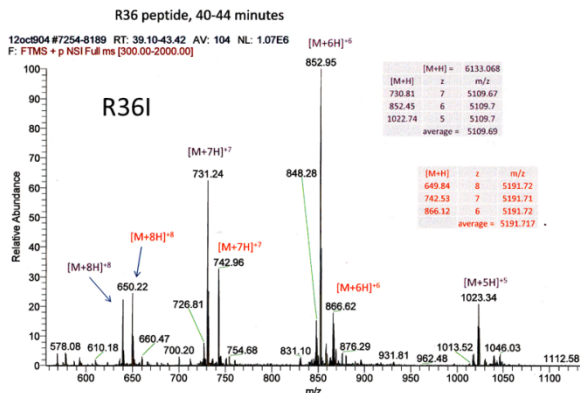

**Figure S2. Non-reducing SDS-PAGE of w/t hBD-3 and some mutants.** W/t hBD-3 and respective mutants were boiled in SDS-loading buffer without reducing reagent and applied to 12% Bio-Rad ready-gel. After running at 100V for 1hr, gel was fixed and stained. 1: standard; 2: Helix (insert EYLEKALN at C-terminus of hBD-3); 3: 4AAs (insert EYLE at C-terminus of hBD-3); 4: CA (R42E/R43E/K44S/K45S-hBD3); 5: 8-32-36 (K8A/K32S/R36I); 6: CM2 (C18S-hBD3); 7: CM1-6 (C11S/C18S/C23G/C31I/C40G/C41Y); 8: w/t hBD-3.

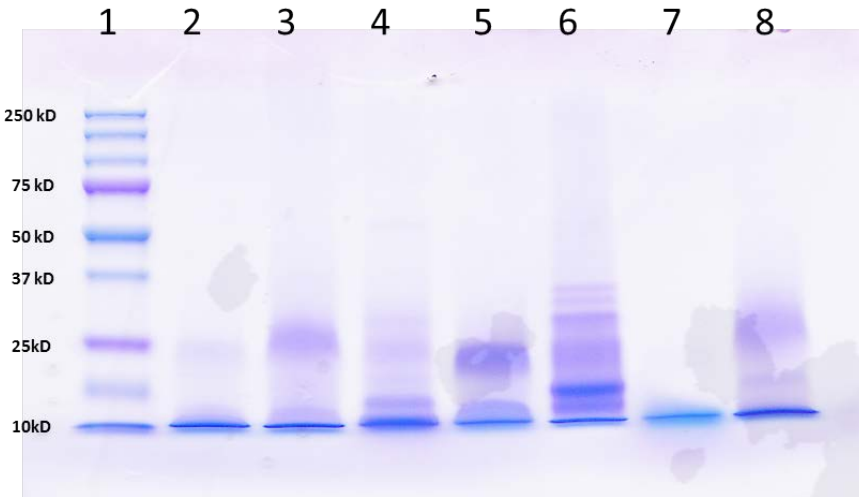

**Figure S3. Reducing SDS-PAGE of w/t hBD-3 and some mutants.** W/t hBD-3 and respective mutants were boiled in regular SDS-loading buffer with reducing reagent and applied to 12% Bio-Rad ready-gel. After running at 100V for 1hr, gel was fixed and stained. 1: standard; 2: Helix (insert EYLEKALN at C-terminus of hBD-3); 3: 4AAs (insert EYLE at C-terminus of hBD3); 4: CA (R42E/R43E/K44S/K45S-hBD3); 5: 8-32-36 (K8A/K32S/R36I); 6: CM2 (C18S-hBD3); 7: CM1-6 (C11S/C18S/C23G/C31I/C40G/C41Y); 8: CM1 (C11S-hBD3); 9: NA2(N4E/T5E/K8A-hBD3); 10: w/t hBD-3.

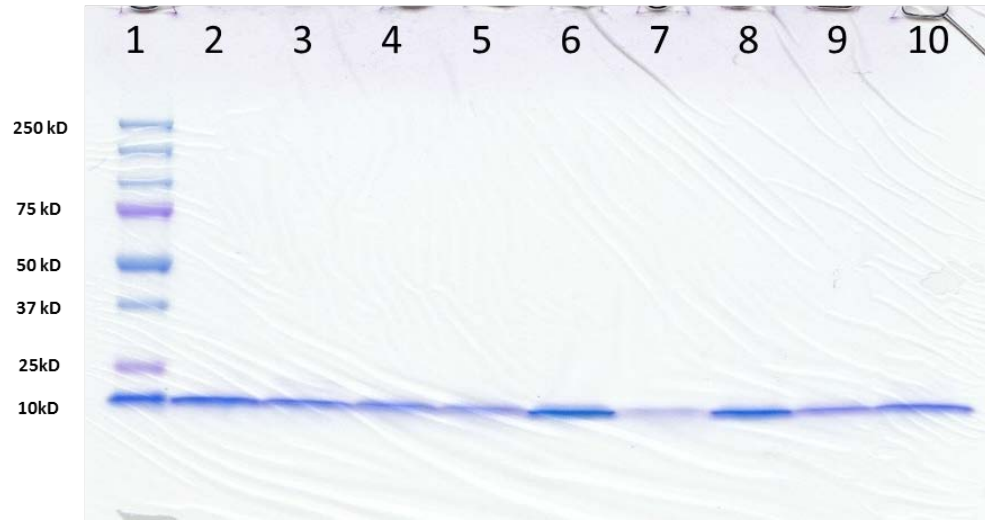

**Table S1. List of hBD-3 mutants.** T: template; F: forward primer; R: reverse primer.

| Name    | Mutations                             | Template and Primers                                                                                                                         |
|---------|---------------------------------------|----------------------------------------------------------------------------------------------------------------------------------------------|
| CM1     | C11S                                  | T: pET-30c-hBD3<br>F: C ACA TTA CAG AAA TAT TAT TCC CGA GTC<br>AGA GGC GGC<br>R: CT GAC TCG GGA ATA ATA TTT CTG TAA<br>TGT GTT TAT GAT TCC C |
| CM2     | C18S                                  | T: pET-30c-hBD3<br>F: GGC CGG TCT GCA GTG CTC AGC GGT CTA<br>CCA AAG GAG<br>R: GCT GAG CAC TGC AGA CCG GCC GCC TCT<br>GAC TCG GG             |
| CM3     | C23G                                  | T: pET-30c-hBD3<br>F: CGG TGT GCT GTG CTC AGC GGT CTA CCA<br>AAG GAG GAA CAG<br>R: C CTT TGG TAG ACC GCT GAG CAC AGC<br>ACA CCG GCC GCC      |
| CM4     | C33I                                  | T: pET-30c-hBD3<br>F: G GAG GAA CAG ATC GGC AAG ATA TCG<br>ACG CGT G<br>R:<br>GCCTTTTCGGCCACGCGTCGATATCTTGCCGATC                             |
| CM56    | C40G/C41Y                             | T: pET-30c-hBD3<br>F: GGC CGA AAA GGC TAC CGA AGA AAG<br>AAA TAA GCG GCC GC<br>R: CTT TCT TCG GTA GCC TTT TCG GCC ACG<br>CGT CGA GCA C       |
| CM 1-6  | C11S/ C18S/ C23G/ C40G/<br>C41Y/ C33I | T: CM15632<br>Primers: same as CM4                                                                                                           |
| K8A     | K8A                                   | T: T: pET-30c-hBD3<br>F: C GAC AAG GGA ATC ATA AAC ACA TTA<br>CAA GCT TAT TAT TGC<br>R: CC GCC TCT GAC TCT GCA ATA ATA AGC<br>TTG TAA TGT G  |
| K32S    | K32S                                  | T: pET-30c-hBD3<br>F: GAA CAG ATC GGA TCC TGC TCG ACG CGT<br>GGC CGA AAA TGC<br>R: CG CGT CGA GCA GGA TCC GAT CTG TTC<br>CTC CTT TGG AAG     |
| R36I    | R36I                                  | T: pET-30c-hBD3<br>F: C TGC TCG ACG ATC GGC CGA AAA TGC<br>TGC CGA AGA AAG<br>R: CAT TTT CGG CCG ATC GTC GAG CAG GAT<br>CCG ATC TGT TC       |
| 8-32    | K8A/K32S                              | T: K8A<br>Primers: same as K32S                                                                                                              |
| 8-32-36 | K8A/ K32S/ R36I                       | T: 8-32<br>Primers: same as R36                                                                                                              |

|          |                                        |                                                                                                                                                                                |
|----------|----------------------------------------|--------------------------------------------------------------------------------------------------------------------------------------------------------------------------------|
| Helix    | Insert EYLEKALN at C-terminus          | T: pET-30c-hBD3<br>F: GC TGC CGA AGA AAG AAA GAG TAC TTA<br>GAA AAG GCA CTC AAT TAA GCG GCC GC<br>R: CTC GAG TGC GGC CGC TTA ATT GAG TGC<br>CTT TTC TAA GTA CTC TTT CTT TCT TC |
| 8AAs     | Insert EKGAYNEL at C-terminus          | T: pET-30c-hBD3<br>F: GC TGC CGA AGA AAG AAA GAG AAG GGA<br>GCA TAC AAT GAG CTC TAA GCG GCC GC<br>R: CTC GAG TGC GGC CGC TTA GAG<br>CTCATTGTATGCTCCCTTCTTTCTTTCTTC             |
| 4AAs     | Insert EYLE at C-terminus              | T: pET-30c-hBD3<br>F: GC TGC CGA AGA AAG AAA GAG TAC TTA<br>GAA TAA GCG GCC GC<br>R: CTC GAG TGC GGC CGC TTA TTC TAA GTA<br>CTC TTT CTT TCT TC                                 |
| SSKK     | R42S/ R43S                             | T: T: pET-30c-hBD3<br>F: CG CGT GGC CGA AAA TGC TGC AGC AGT<br>AAG AAA TAA GC<br>R: GAG TGC GGC CGC TTA TTT CTT ACT GCT<br>GCAGCATTTTCG                                        |
| RRGG     | K44G/ K45G                             | T: pET-30c-hBD3<br>F: CG ACG CGT GGC CGA AAA TGC TGC AGA<br>AGA GGG GGA TAA GCG GCC GC<br>R: GTG CTC GAG TGC GGC CGC TTA TCC CCC<br>TCTTCTGCAGCATTTTCG                         |
| AAGG     | R42A/ R43A/ K44G/ K45G                 | T: pET-30c-hBD3<br>F: CG ACG CGT GGC CGA AAA TGC TGC GCT<br>GCA GGG GGA TAA GCG GCC GC<br>R: GTG CTC GAG TGC GGC CGC TTA TCC CCC<br>TGC AGC GCA GCATTTTCG                      |
| RRKKRRRK | Insert RRRK at C-terminus              | T: pET-30c-hBD3<br>F: GC TGC CGA AGA AAG AAA CGT AGA CGT<br>AAA TAA GCG GCC GC<br>R: CTC GAG TGC GGC CGC TTA TTT ACG TCT<br>ACG TTT CTT TCTTC                                  |
| CA       | R42E/ R43E/ K44S/ K45S                 | T: pET-30c-hBD3<br>F: CG ACG CGT GGC CGA AAA TGC TGC GAA<br>GAG AGC TCA TAA GCG GCC GC<br>R: GTG CTC GAG TGC GGC CGC TTA TGA GCT<br>CTC TTC GCA GCATTTTCG                      |
| CA-NC    | N4R/ T5R/ R42E/ R43E/<br>K44S/ K45S    | T: CA<br>F: GAC GAC AAG GGA ATC ATA CGT AGA CTA<br>CAG AAA TAT TAT TG<br>R: C TCT GCA ATA ATA TTT CTG TAG TCT ACG<br>TAT GAT TCC CTT G                                         |
| H2N      | Replace G1 through Y10<br>with GIGDPVT | T: pET-30c-hBD3<br>F: CC GAC GAC GAC GAC AAG GGA ATC GGG                                                                                                                       |

|       |                                             |                                                                                                                                                                               |
|-------|---------------------------------------------|-------------------------------------------------------------------------------------------------------------------------------------------------------------------------------|
|       |                                             | GAT CCA GTA ACG TGC AGA GTC AGA GGC<br>GGC<br>R: CCG GCC GCC TCT GAC TCT GCA CGT TAC<br>TGG ATC CCC GAT TCC CTT GTC GTC GTC G                                                 |
| NA2   | N4E/ T5E/ K8A                               | T: pET-30c-hBD3<br>F: GAC GAC GAC GAC AAG GGA ATC ATA GAA<br>GAG CTC CAG GCA TAT TAT TGC AGA G<br>R: GCC GCC TCT GAC TCT GCA ATA ATA TGC<br>CTG GAG CTC TTC TAT GAT TCC CTT G |
| NC    | N4R/ T5R                                    | T: pET-30c-hBD3<br>Primers: same as CA-NC                                                                                                                                     |
| 6-45  | Delete G1 through T5                        | T: pET-30c-hBD3<br>F: CTG GGT ACC GAC GAC GAC GAC AAG TTA<br>CAG AAA TAT TAT TGC<br>R: CT GAC TCT GCA ATA ATA TTT CTG TAA<br>CTT GTC GTC GTC GTC G                            |
| 11-45 | Delete G1 through Y10                       | T: 6-45<br>F: GGT ACC GAC GAC GAC GAC AAG TGC AGA<br>GTC AGA GGC GGC<br>R: CA CCG GCC GCC TCT GAC TCT GCA CTT<br>GTC GTC GTC GTC GG                                           |
| 6-41  | Delete G1 through T5 and<br>R42 through K45 | T: 6-45<br>F: CG ACG CGT GGC CGA AAA TGC TGC TAA<br>GCG GCC GCA CTC GAG<br>R: GTG CTC GAG TGC GGC CGC TTA GCA GCA<br>TTT TCG GCC ACG                                          |
|       |                                             |                                                                                                                                                                               |
